# Supplementary material for: Histone Methyltransferase G9a-Promoted Progression of Hepatocellular Carcinoma Is Targeted by Liver-Specific Hsa-miR-122
Source: MDPI journal article supplement (doi:10.3390/cancers13102376), 2021-05-14
Supplement: s1 [file s1]

Supplementary

# Histone Methyltransferase G9a-Promoted Progression of Hepatocellular Carcinoma Is Targeted by Liver-Specific Has-miR-122

Lan-Ting Yuan et al.

**Citation:** Yuan, L.-T.; Lee, W.-J.; Yang, Y.-C.; Chen, B.-R.; Yang, C.-Y.; Chen, M.-W.; Chen, J.-Q.; Hsiao, M.; Chien, M.-H.; Hua, K.-T.; et al. Histone Methyltransferase G9a-Promoted Progression of Hepatocellular Carcinoma Is Targeted by Liver-Specific Hsa-miR-122. *Cancers* **2021**, *13*, 2376. <https://doi.org/10.3390/cancers13102376>

Academic Editor: Takahiro Kodama

Received: 30 March 2021

Accepted: 11 May 2021

Published: 14 May 2021

**Publisher's Note:** MDPI stays neutral with regard to jurisdictional claims in published maps and institutional affiliations.

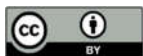

**Copyright:** © 2021 by the authors. Licensee MDPI, Basel, Switzerland. This article is an open access article distributed under the terms and conditions of the Creative Commons Attribution (CC BY) license (<http://creativecommons.org/licenses/by/4.0/>).

**Fig. 2A**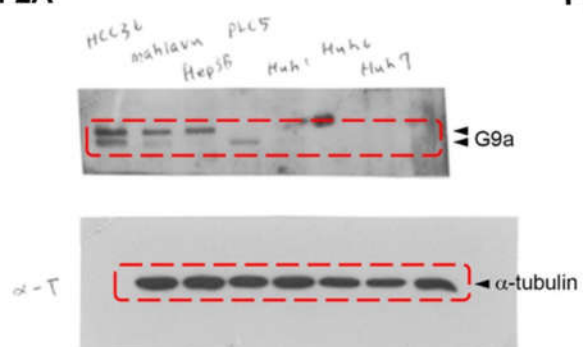**Fig. 2B**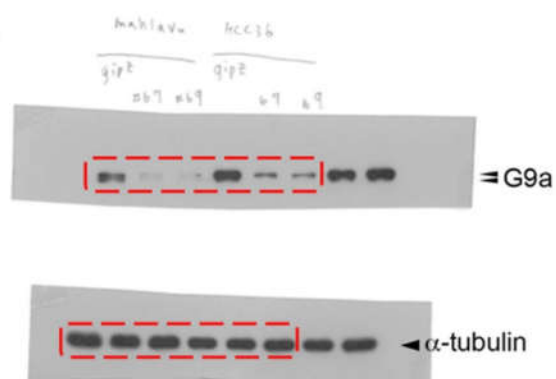**Fig. 5C**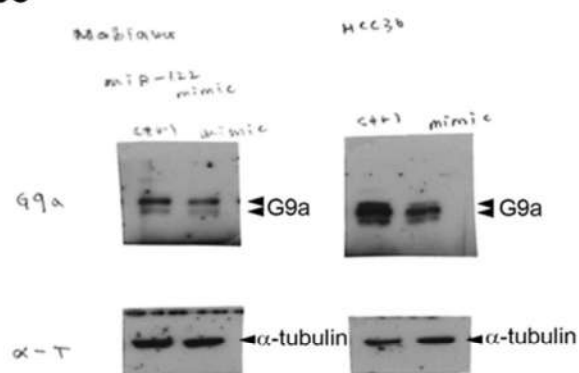**Fig. 5D**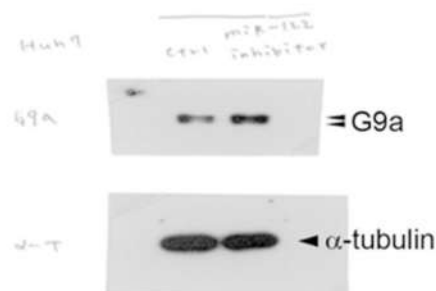**Fig. 5F**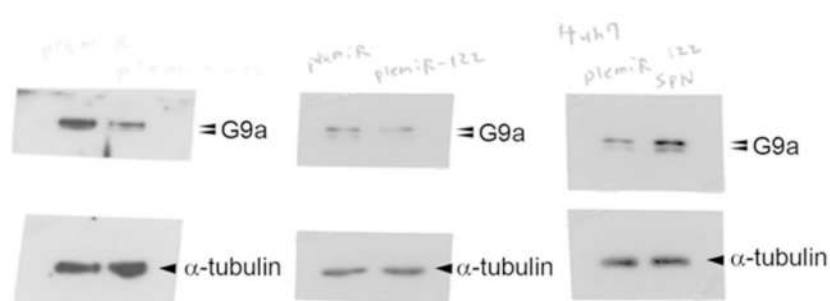**Figure S1.** Uncropped blots used in main figures.

**Table 1.** Primer and probe sequences used for quantitative PCR.

| Gene               | Primer sequences (5'-3')                                               |
|--------------------|------------------------------------------------------------------------|
| <i>G9a/EHMT2</i>   | (F) GGAGCCACGAGGGGTGTCCA<br>(R) CGGCATTGCAGCCTGACAGC                   |
| <i>ACTIN</i>       | (F) GGCGGCACCACCATGTACCCT<br>(R) AGGGGCCCGACTCGTCATACT                 |
| Gene               | Probe sequences (5'-3')                                                |
| <i>has-miR-122</i> | UGGAGUGUGACAAUGGUGUUUG<br>(AB Assay ID 002245)                         |
| <i>RUN6B</i>       | CGCAAGGATGACACGCAAATTCGTG<br>AAGCGTTCCATATTTTT<br>(AB Assay ID 001093) |

**Table S2.** The correlation between CpG methylation and G9a gene expression.

| CpG sites* | Spearman's coefficient of rank correlation (rho) (95%CI) | Significance |
|------------|----------------------------------------------------------|--------------|
| cg07829740 | −0.356 (−0.442 to −0.264)                                | $p < 0.0001$ |
| cg07498938 | −0.297 (−0.387 to −0.201)                                | $p < 0.0001$ |
| cg21190306 | −0.29 (−0.380 to −0.194)                                 | $p < 0.0001$ |
| cg02758274 | −0.282 (−0.373 to −0.185)                                | $p < 0.0001$ |
| cg08848598 | −0.28 (−0.371 to −0.183)                                 | $p < 0.0001$ |
| cg21087321 | −0.276 (−0.367 to −0.179)                                | $p < 0.0001$ |
| cg07898120 | −0.273 (−0.364 to −0.176)                                | $p < 0.0001$ |
| cg17756143 | −0.271 (−0.362 to −0.174)                                | $p < 0.0001$ |
| cg03146965 | −0.262 (−0.355 to −0.165)                                | $p < 0.0001$ |
| cg27363691 | −0.261 (−0.353 to −0.163)                                | $p < 0.0001$ |
| cg22240884 | −0.259 (−0.352 to −0.162)                                | $p < 0.0001$ |
| cg04637007 | −0.258 (−0.351 to −0.160)                                | $p < 0.0001$ |
| cg21831287 | −0.255 (−0.347 to −0.157)                                | $p < 0.0001$ |
| cg03164052 | −0.254 (−0.346 to −0.156)                                | $p < 0.0001$ |
| cg03945301 | −0.253 (−0.346 to −0.155)                                | $p < 0.0001$ |
| cg19770715 | −0.252 (−0.345 to −0.154)                                | $p < 0.0001$ |
| cg21356750 | −0.251 (−0.344 to −0.153)                                | $p < 0.0001$ |

\* The CpG sites within G9a promoter region and gene locus with  $\rho < -0.25$  and  $p < 0.0001$  are shown.
